# Supplementary material
Source: publisher site journal article supplement (https://www.dovepress.com/article/522534)
Supplement: Supplementary file 1 [file 522534+Revised+Supplementary+Material.docx]

**Supplemental Materials**

**Appendix Table 1:** PubMed Search Strategy

| PubMed | Search Terminology | Hits |
| --- | --- | --- |
| 1 | (Infusion OR infusions) | 355,970 |
| 2 | (smart pump interoperability OR smart pump integration OR Integrated smart pump OR smart pump auto-programmed OR smart pump auto-programming OR pump integration) | 4,838 |
| 3 | (Medical errors OR medication errors OR infusion errors OR adverse drug events OR ADEs OR safety OR preventable adverse drug events OR adverse outcomes OR errors) | 2,256,665 |
| 4 | (Inpatient OR Hospitalization OR Hospital OR medical center OR health care system OR admission OR health system) | 11,069,211 |
| 5 | 1 AND 2 AND 3 AND 4 | 90 |

**Appendix Table 2:** Embase Search Strategy

| Embase | Search Terminology | Hits |
| --- | --- | --- |
| 1 | (Infusion OR infusions) | 488,777 |
| 2 | (smart pump interoperability OR smart pump integration OR Integrated smart pump OR smart pump auto-programmed OR smart pump auto-programming OR pump integration) | 1,327 |
| 3 | (Medical errors OR medication errors OR infusion errors OR adverse drug events OR ADEs OR safety OR preventable adverse drug events OR adverse outcomes OR errors) | 688,583 |
| 4 | (Inpatient OR Hospitalization OR Hospital OR medical center OR health care system OR admission OR health system) | 1,890,970 |
| 5 | 1 AND 2 AND 3 AND 4 | 87 |

**Appendix Table 3:** Completed PRISMA 2020 Checklist of Items to Include When Reporting a Systematic Review

| Section and Topic | Item Number | Checklist Item | Location Where Item is Reported |
| --- | --- | --- | --- |
| **Title** | | | |
| Title | 1 | Identify the report as a systematic review. | Page 1 |
| **Abstract** | | | |
| Abstract | 2 | 1. Identify the report as a systematic review.  2. Provide an explicit statement of the main objective(s) or question(s) the review addresses.  3. Specify the inclusion and exclusion criteria for the review.  4. Specify the information sources (such as databases, registers) used to identify studies and the date when each was last searched.  5. Specify the methods used to assess risk of bias in the included studies.  6. Specify the methods used to present and synthesize results.  7. Give the total number of included studies and participants and summarize relevant characteristics of studies.  8. Present results for main outcomes, preferably indicating the number of included studies and participants for each.  9. Provide a brief summary of the limitations of the evidence included in the review (such as study risk of bias, inconsistency, and imprecision).  10. Provide a general interpretation of the results and important implications.  11. Specify the primary source of funding for the review.  12. Provide the register name and registration number. | Pages 3-4 |
| **Introduction** | | | |
| Rationale | 3 | Describe the rationale for the review in the context of existing knowledge. | Pages 5-7 |
| Objectives | 4 | Provide an explicit statement of the objective(s) or question(s) the review addresses. | Page 7 |
| **Methods** | | | |
| Eligibility Criteria | 5 | Specify the inclusion and exclusion criteria for the review and how studies were grouped for the syntheses. | Pages 8-9 |
| Information Sources | 6 | Specify all databases, registers, websites, organizations, reference lists and other sources searched or consulted to identify studies. Specify the date when each source was last searched or consulted. | Page 8 |
| Search Strategy | 7 | Present the full search strategies for all databases, registers, and websites, including any filters and limits used. | Appendix Tables 1-2 |
| Selection Process | 8 | Specify the methods used to decide whether a study met the inclusion criteria of the review, including how many reviewers screened each record and each report retrieved, whether they worked independently, and if applicable, details of automation tools used in the process. | Pages 8-10 |
| Data Collection Process | 9 | Specify the methods used to collect data from reports, including how many reviewers collected data from each report, whether they worked independently, any processes for obtaining or confirming data from study investigators, and if applicable, details of automation tools used in the process. | Page 10 |
| Data Items | 10a | List and define all outcomes for which data were sought. Specify whether all results that were compatible with each outcome domain in each study were sought (e.g. for all measures, time points, analyses), and if not, the methods used to decide which results to collect. | Pages 9-10 |
| 10b | List and define all other variables for which data were sought (e.g. participant and intervention characteristics, funding sources). Describe any assumptions made about any missing or unclear information. | Pages 9-10 |
| Study Risk of Bias Assessment | 11 | Specify the methods used to assess risk of bias in the included studies, including details of the tool(s) used, how many reviewers assessed each study and whether they worked independently, and if applicable, details of automation tools used in the process. | Page 10 |
| Effect Measures | 12 | Specify for each outcome the effect measure(s) (e.g., risk ratio, mean difference) used in the synthesis or presentation of results. | Not Applicable |
| Synthesis Methods | 13a | Describe the processes used to decide which studies were eligible for each synthesis (e.g., tabulating the study intervention characteristics and comparing against the planned groups for each synthesis (item number 5)). | Page 10 |
| 13b | Describe any methods required to prepare the data for presentation or synthesis, such as handling of missing summary statistics, or data conversions. | Not Applicable |
| 13c | Describe any methods used to tabulate or visually display results of individual studies and syntheses. | Not Available |
| 13d | Describe any methods used to synthesize results and provide a rationale for the choice(s). If meta-analysis was performed, describe the model(s), method(s) to identify the presence and extent of statistical heterogeneity, and software package(s) used. | Not Applicable |
| 13e | Describe any methods used to explore possible causes of heterogeneity among study results (e.g., subgroup analysis, meta-regression). | Not Applicable |
| 13f | Describe any sensitivity analyses conducted to assess robustness of the synthesized results. | Not Applicable |
| Reporting Bias Assessment | 14 | Describe any methods used to assess risk of bias due to missing results in a synthesis (arising from reporting biases). | Not Available |
| Certainty Assessment | 15 | Describe any methods used to assess certainty (or confidence) in the body of evidence for an outcome. | Not Applicable |
| **Results** | | | |
| Study Selection | 16a | Describe the results of the search and selection process, from the number of records identified in the search to the number of studies included in the review, ideally using a flow diagram. | Page 11, Figure 1 |
| 16b | Cite studies that might appear to meet the inclusion criteria, but which were excluded, and explain why they were excluded. | Not Applicable |
| Study Characteristics | 17 | Cite each included study and present its characteristics. | Pages 11-12, Table 1 |
| Risk of Bias in Studies | 18 | Present assessments of risk of bias for each included study. | Supplemental Table 4, Page 11 |
| Results of Individual Studies | 19 | For all outcomes, present, for each study: (a) summary statistics for each group (where appropriate) and (b) an effect estimate and its precision (e.g., confidence/credible interval), ideally using structured tables or plots. | Not Applicable |
| Results of Syntheses | 20a | For each synthesis, briefly summarize the characteristics and risk of bias among contributing studies. | Not Available |
| 20b | Present results of all statistical syntheses conducted. If meta-analysis was done, present for each the summary estimate and its precision (e.g., confidence/credible interval) and measures of statistical heterogeneity. If comparing groups, describe the direction of the effect. | Not Applicable |
| 20c | Present results of all investigations of possible causes of heterogeneity among study results. | Not Applicable |
| 20d | Present results of all sensitivity analyses conducted to assess the robustness of the synthesized results. | Not Applicable |
| Reporting Biases | 21 | Present assessments of risk of bias due to missing results (arising from reporting biases) for each synthesis assessed. | Not Available |
| Certainty of Evidence | 22 | Present assessments of certainty (or confidence) in the body of evidence for each outcome assessed. | Not Applicable |
| **Discussion** | | | |
| Discussion | 23a | Provide a general interpretation of the results in the context of other evidence. | Pages 13-19 |
| 23b | Discuss any limitations of the evidence included in the review. | Pages 13-19 |
| 23c | Discuss any limitations of the review processes used. | Page 18-19 |
| 23d | Discuss implications of the results for practice, policy, and future research. | Pages 13-19 |
| **Other Information** | | | |
| Registration and Protocol | 24a | Provide registration information for the review, including register name and registration number, or state that the review was not registered. | Not Available |
| 24b | Indicate where the review protocol can be accessed, or state that a protocol was not prepared. | Not Available |
| 24c | Describe and explain any amendments to information provided at registration or in the protocol. | Not Available |
| Support | 25 | Describe sources of financial or non-financial support for the review, and the role of the funders or sponsors in the review. | Not Applicable (No funding was provided) |
| Competing Interests | 26 | Declare any competing interests of review authors. | All authors are employees at Becton, Dickinson and Company |
| Availability of Data, Code, and Other Materials | 27 | Report which of the following are publicly available and where they can be found: template data collection forms; data extracted from included studies; data used for all analyses; analytic code; any other materials used in the review. | Not Available |

**Appendix Table 4**: Completed Quality Assessment Using the National Institutes of Health’s Quality Assessment Tool for Observational Cohort and Cross-Sectional Studies

| Criteria | Skog22 | VanHorn32 | Chin13 |
| --- | --- | --- | --- |
| Was the research question or objective in this paper clearly stated? | Yes | Yes | Yes |
| Was the study population clearly specified and defined? | Yes | Yes | Yes |
| Was the participation rate of eligible persons at least 50%? | N/A | N/A | N/A |
| Were all the subjects selected or recruited from the same or similar populations (including the same time period)? Were inclusion and exclusion criteria for being in the study prespecified and applied uniformly to all participants? | Yes | Yes | Yes |
| Was a sample size justification, power description, or variance and effect estimates provided? | No | No | No |
| For the analyses in this paper, were the exposure(s) of interest measured prior to the outcome(s) being measured? | Yes | Yes | Yes |
| Was the timeframe sufficient so that one could reasonably expect to see an association between exposure and outcome if it existed? | Yes | Yes | Yes |
| For exposures that can vary in amount or level, did the study examine different levels of the exposure as related to the outcome (e.g., categories of exposure, or exposure measured as continuous variable)? | N/A | N/A | N/A |
| Were the exposure measures (independent variables) clearly defined, valid, reliable, and implemented consistently across all study participants? | Yes | Yes | Yes |
| Was the exposure(s) assessed more than once over time? | No | No | No |
| Were the outcome measures (dependent variables) clearly defined, valid, reliable, and implemented consistently across all study participants? | Yes | Yes | Yes |
| Were the outcome assessors blinded to the exposure status of participants? | No | No | No |
| Was loss to follow-up after baseline 20% or less? | N/A | N/A | N/A |
| Were key potential confounding variables measured and adjusted statistically for their impact on the relationship between exposure(s) and outcome(s)? | No | No | No |
| Quality Rating (Poor, Fair, Good) | Fair | Fair | Fair |
